# Supplementary figures and images for: Knockdown of the Sodium/Potassium ATPase Subunit Beta 2 Reduces Egg Production in the Dengue Vector, Aedes aegypti
Source: MDPI journal article supplement (doi:10.3390/insects14010050), 2023-01-05

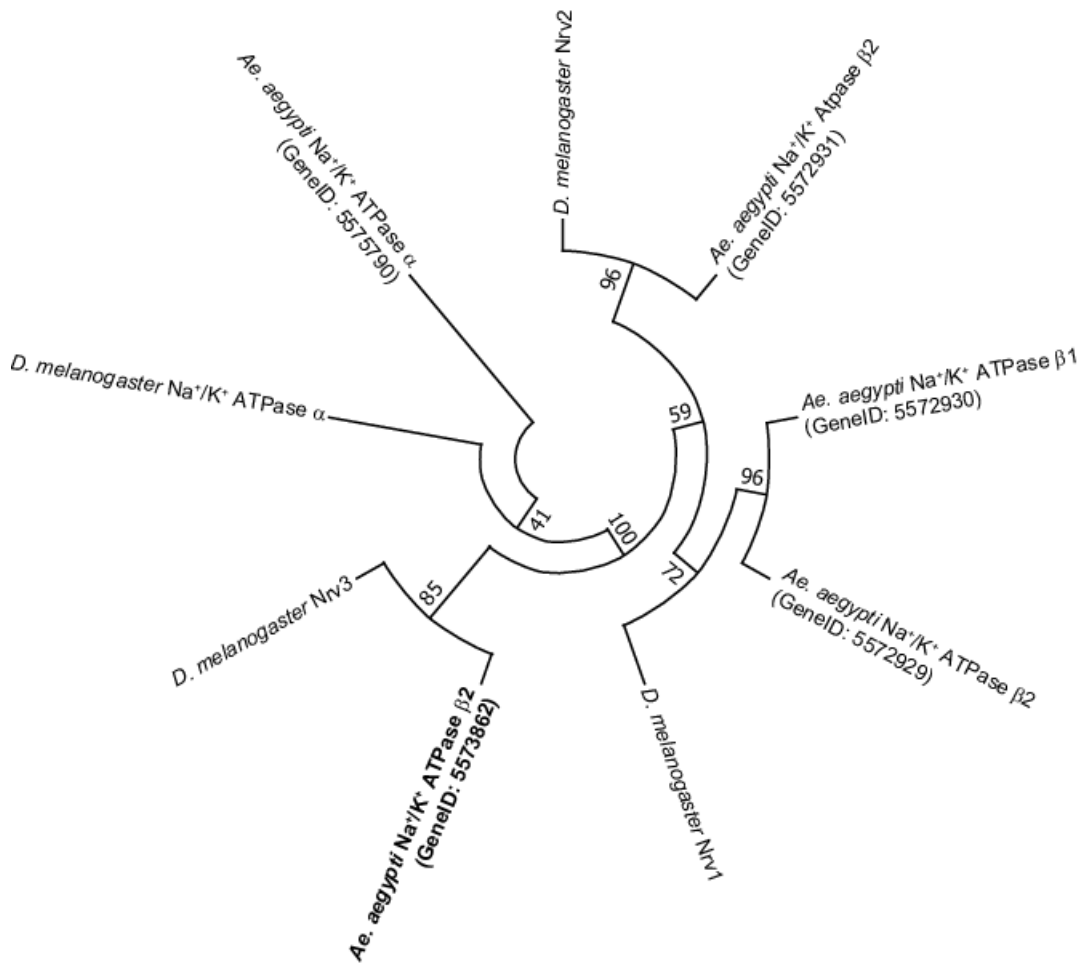

Supplement: s1 [file s1]
